# Supplementary material for: Suppressed Auger recombination and enhanced emission of InP/ZnSe/ZnS quantum dots through inner shell manipulation
Source: Royal Society of Chemistry journal article supplement (doi:10.1039/d3nr05010f), 2023-01-01
Supplement: d3nr05010f1.pdf [file d3nr05010f1.pdf]

## Supporting Information

### **Suppressed Auger recombination and enhanced emission of InP/ZnSe/ZnS quantum dots through inner-shell manipulation**

Yaru Chen,<sup>a,†</sup> Rixin Wang,<sup>a,†</sup> Yanmin Kuang,<sup>a,\*</sup> Yangyang Bian<sup>b</sup>, Fei Chen<sup>b</sup>,  
Huaibin Shen<sup>b</sup>, Zhen Chi<sup>a</sup>, Xia Ran<sup>a</sup> and Lijun Guo<sup>a,\*</sup>

<sup>a</sup> School of Physics and Electronics, International Joint Research Laboratory of New Energy Materials and Devices of Henan Province, Henan University, Kaifeng, 475004, China

<sup>b</sup> Key Laboratory for Special Functional Materials of Ministry of Education National & Local Joint Engineering Research Center for High-Efficiency Display and Lighting Technology Collaborative Innovation Center of Nano Functional Materials and Applications, Henan University, Kaifeng, 475004, P. R. China

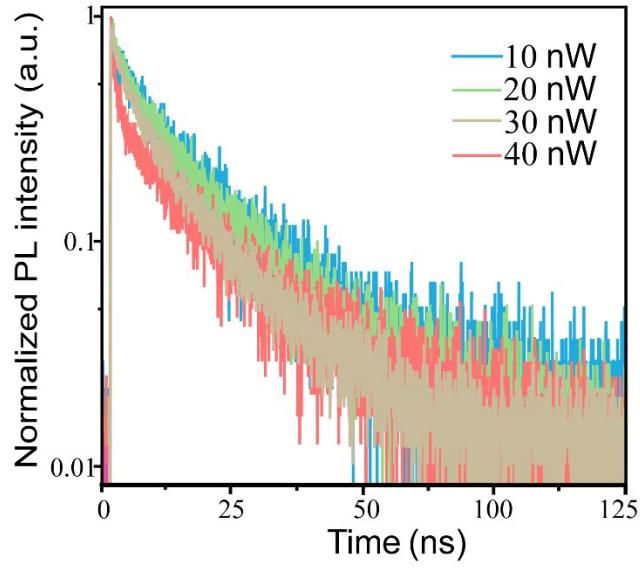

**Fig. S1.** Representative PL decay curves of single InP/2ZnSe/ZnS QDs under different excitation powers.

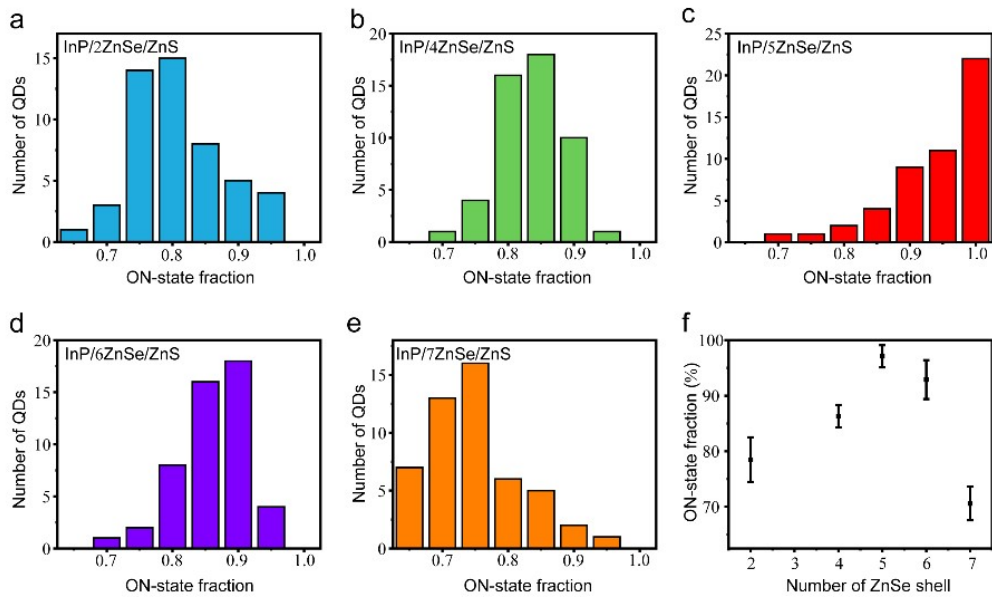

**Fig. S2.** (a–e) Histograms of ON-states fraction for single InP/ZnSe/ZnS QDs with 2, 4, 5, 6 and 7 MLs of inner ZnSe shell. (f) The average ON-states fraction for single QDs with different number of ZnSe shell monolayers, based on the results from randomly selected  $\sim 50$  dots of each InP/ZnSe/ZnS QDs.

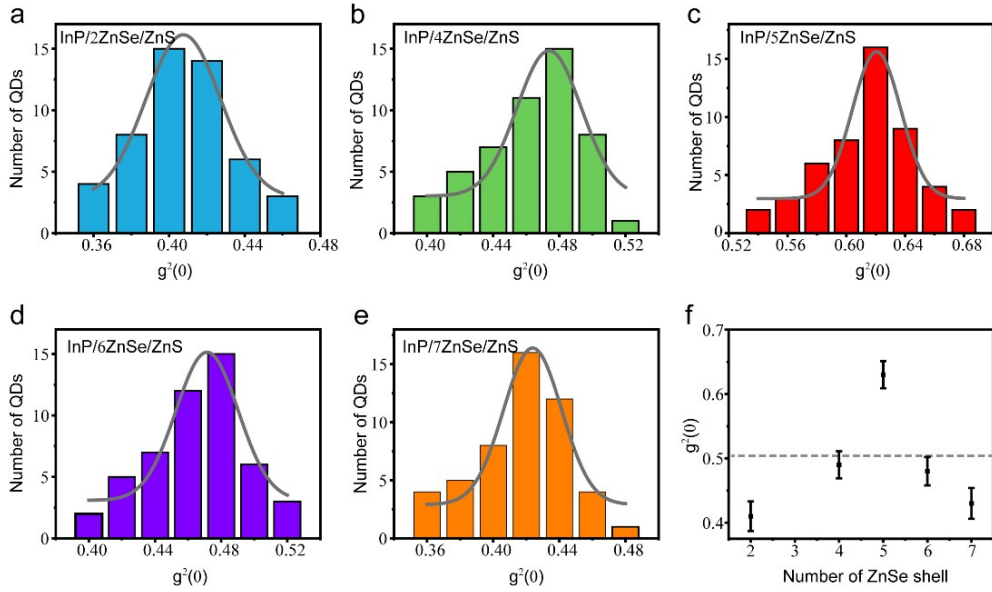

**Fig. S3.** (a–e) Histograms of  $g^2(0)$  for single InP/ZnSe/ZnS QDs with 2, 4, 5, 6 and 7 MLs of inner ZnSe shell. (f) The average  $g^2(0)$  for single QDs with different number of ZnSe shell monolayers, based on the results from randomly selected  $\sim 50$  dots of each InP/ZnSe/ZnS QDs.

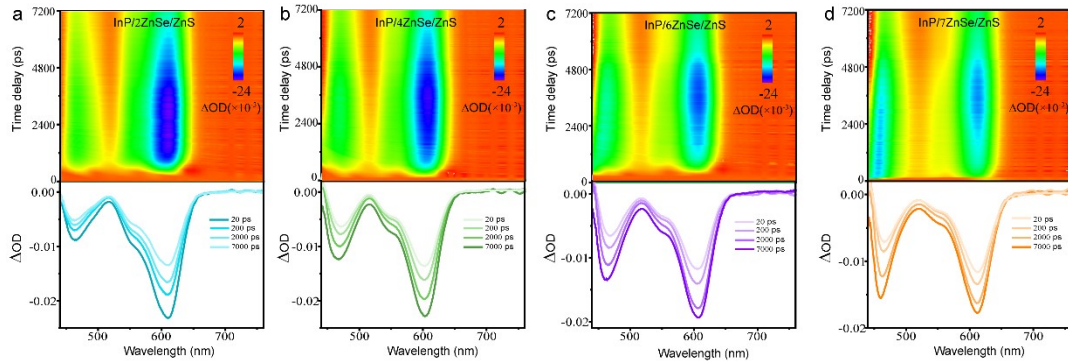

**Fig. S4.** (a–d) Transient absorption (TA) map and corresponding TA spectra with different time delays for InP/ZnSe/ZnS QDs with 2, 4, 6, 7 MLs, respectively.

**Table S1.** Bi-exponential fitting parameters of TA kinetics for InP/5ZnSe/ZnS QDs displayed in Fig. 5d with increasing pump power from 20  $\mu\text{W}$  to 100  $\mu\text{W}$ .

| Pump power        | $A_{\text{fast}}\%$ | $A_{\text{slow}}\%$ | $\tau_{\text{fast}}$ (ps) | $\tau_{\text{slow}}$ (ns) |
|-------------------|---------------------|---------------------|---------------------------|---------------------------|
| 20 $\mu\text{W}$  | 32.01               | 67.99               | 320                       | 3.5                       |
| 40 $\mu\text{W}$  | 38.13               | 61.87               | 161                       | 3.5                       |
| 50 $\mu\text{W}$  | 40.86               | 59.14               | 150                       | 3.6                       |
| 80 $\mu\text{W}$  | 46.84               | 53.18               | 100                       | 3.7                       |
| 100 $\mu\text{W}$ | 48.35               | 51.65               | 90                        | 3.8                       |
